# Supplementary material for: Potential of Macrostomum lignano to recover from γ-ray irradiation
Source: PubMed Central journal article supplement — Cell Tissue Res. 2010 Feb 2;339(3):527–42. doi: 10.1007/s00441-009-0915-6 (PMC2831187; doi:10.1007/s00441-009-0915-6), 2010-02-02
Supplement: 441_2009_915_MOESM3_ESM.pdf [file 441_2009_915_MOESM3_ESM.pdf]

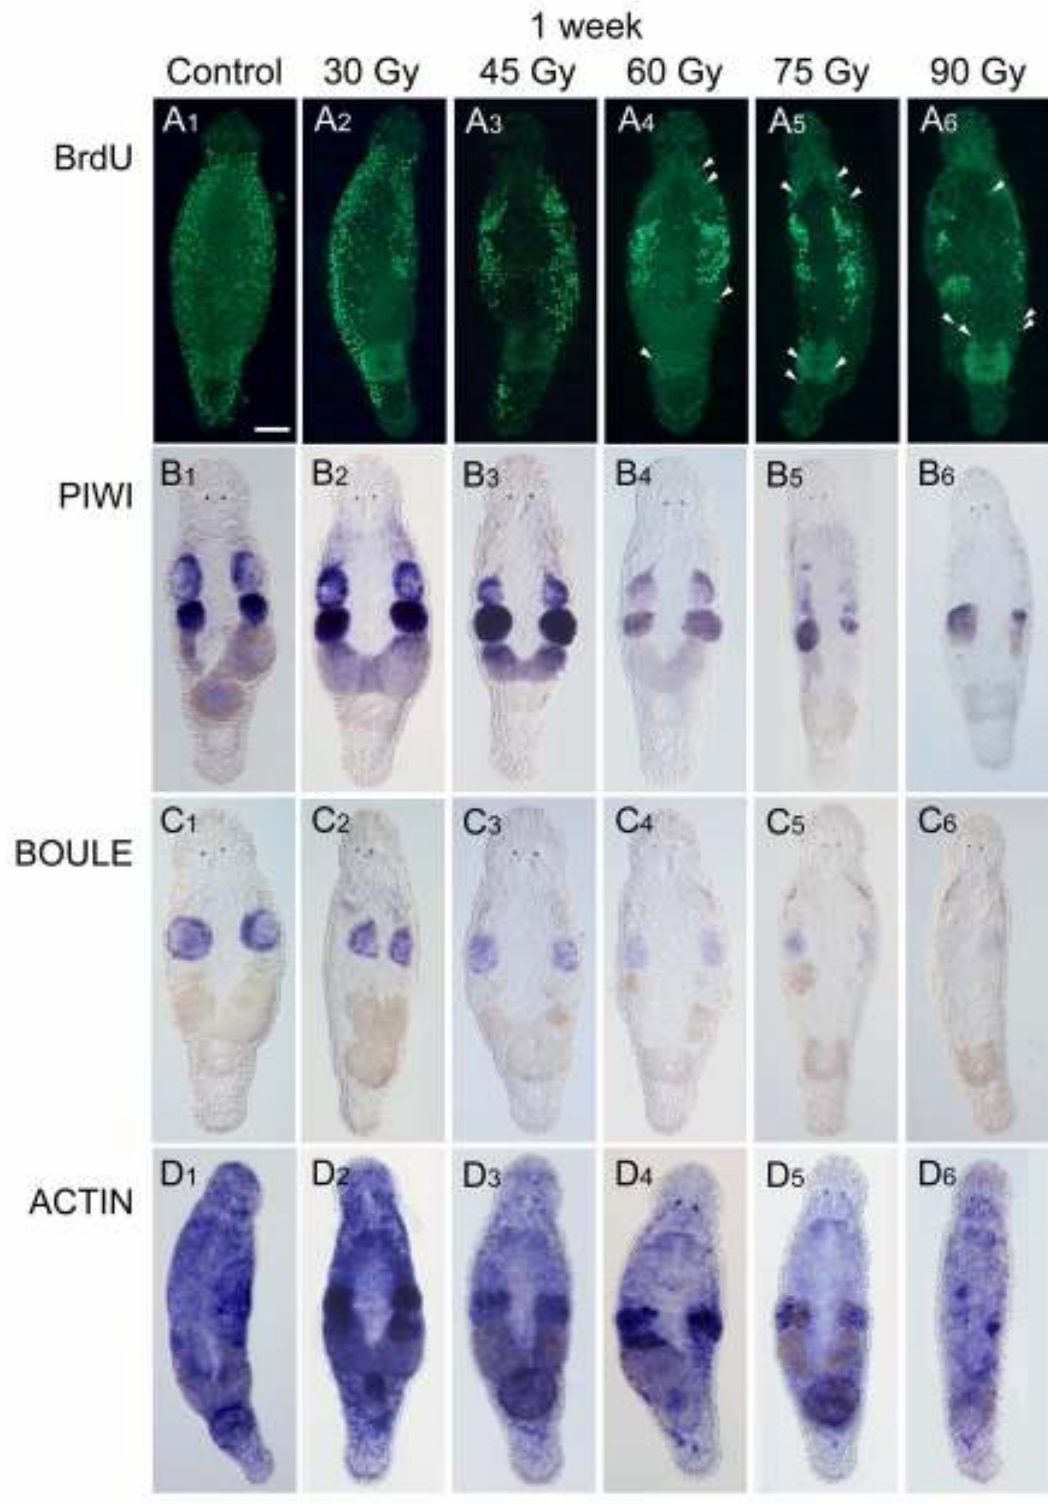

**Fig. S3:** Cell proliferation, *macpiwi*, *macboule* and *macactin* expression dynamics, one week post-irradiation (protocol P1). (A<sub>1</sub>-A<sub>6</sub>) Somatic stem cell proliferation recovered in lateral domains at lower radiation doses (A<sub>2</sub>-A<sub>3</sub>), but recovered only gradually at higher doses

(A<sub>4</sub>-A<sub>6</sub>). Note single proliferating somatic stem cells distributed over the body (full arrowheads). By contrast, proliferating gonadal stem cells remain clearly present at all radiation doses (A<sub>2</sub>-A<sub>6</sub>). (B<sub>1</sub>-B<sub>6</sub>) *Macpiwi* expression one week post-irradiation regained the normal expression pattern at lower doses (B<sub>1</sub>-B<sub>3</sub>), but remained low at higher radiation levels (B<sub>5</sub>, B<sub>6</sub>). *Macpiwi* expression in female gonads was only slightly affected (B<sub>4</sub>-B<sub>6</sub>). (C<sub>1</sub>-C<sub>6</sub>) *Macboule* expression one week post-irradiation showed a dose-dependent downregulation of gene expression (C<sub>5</sub>, C<sub>6</sub>). (D<sub>1</sub>-D<sub>6</sub>) Expression of the housekeeping gene *macactin* one week post-irradiation was slightly reduced. In all figures, anterior is to the top. The scale bar (100 μm) is representative for all worms.
