# Supplementary material for: Potential of Macrostomum lignano to recover from γ-ray irradiation
Source: PubMed Central journal article supplement — Cell Tissue Res. 2010 Feb 2;339(3):527–42. doi: 10.1007/s00441-009-0915-6 (PMC2831187; doi:10.1007/s00441-009-0915-6), 2010-02-02
Supplement: 441_2009_915_MOESM4_ESM.pdf [file 441_2009_915_MOESM4_ESM.pdf]

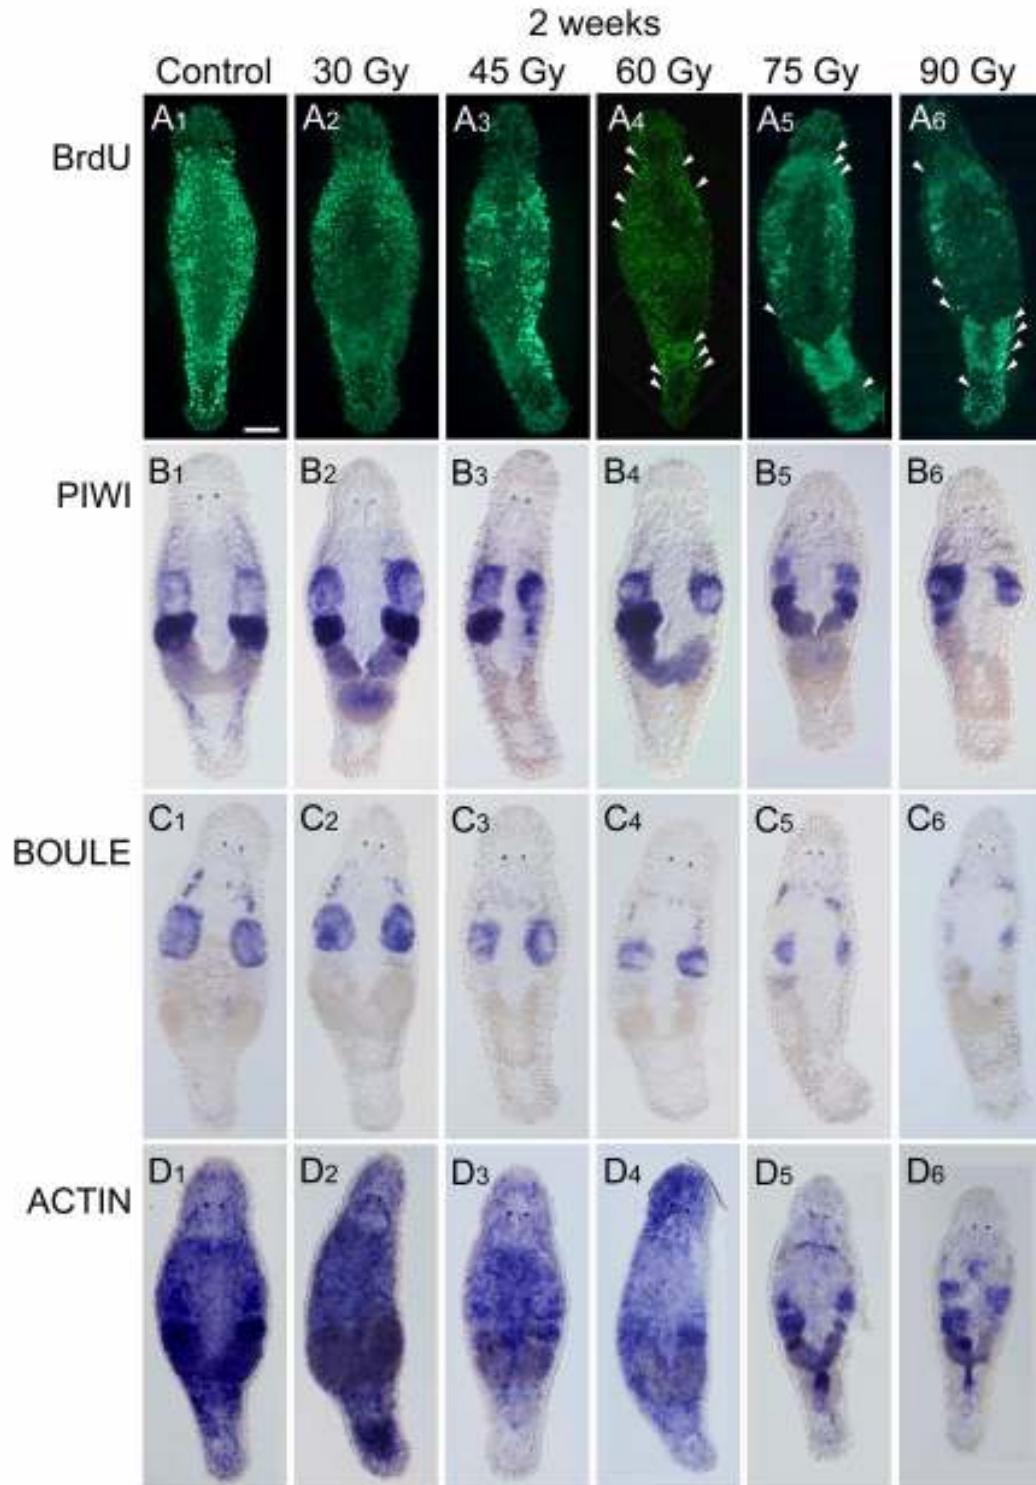

**Fig. S4: Cell proliferation, *macpiwi*, *macboule* and *macactin* expression dynamics, two weeks post-irradiation (protocol P1).** (A<sub>1</sub>-A<sub>6</sub>) Somatic stem cell proliferation recovered at lower radiation doses (A<sub>2</sub>-A<sub>4</sub>) and to a lesser extent at higher doses (arrowheads) (A<sub>5</sub>-A<sub>6</sub>). (B<sub>1</sub>-B<sub>6</sub>) *Macpiwi* expression at two weeks post-irradiation recovered especially in testes and

ovaries. Several animals showed single-side recovery of gonads (B<sub>4</sub>, B<sub>6</sub>). *Macboule* expression (C<sub>1</sub>-C<sub>6</sub>) and *macactin* expression (D<sub>1</sub>-D<sub>6</sub>) were reduced in a dose-dependent manner due to loss of tissue homeostasis. In all figures, anterior is to the top. The scale bar (100 μm) is representative for all worms.
