# Supplementary material for: Potential of Macrostomum lignano to recover from γ-ray irradiation
Source: PubMed Central journal article supplement — Cell Tissue Res. 2010 Feb 2;339(3):527–42. doi: 10.1007/s00441-009-0915-6 (PMC2831187; doi:10.1007/s00441-009-0915-6), 2010-02-02
Supplement: 441_2009_915_MOESM6_ESM.pdf [file 441_2009_915_MOESM6_ESM.pdf]

Note that the reduction in cell proliferation and gene expression after one hour ( $A_2$ - $D_2$ ), one day ( $A_3$ - $D_3$ ), and one week ( $A_4$ - $D_4$ ) was followed by recovery at two weeks ( $A_5$ - $D_5$ ) and three weeks ( $A_6$ - $D_6$ ) post-irradiation. In all figures, anterior is to the top. The scale bar (100  $\mu\text{m}$ ) is representative for all worms.

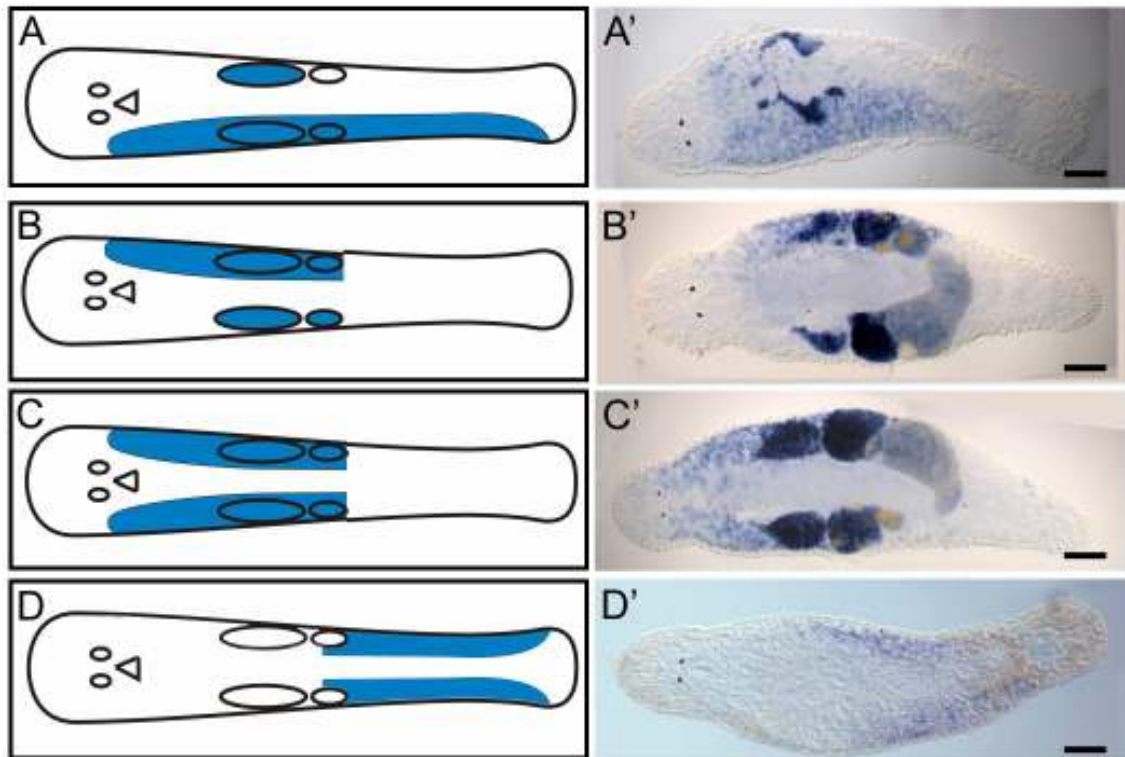

**Fig. S6: Recovery of *macpiwi* expression in different regions of the animal after three days chase time.** Somatic stem cell recovery on the left lateral side (A, A'), the right anterior compartment (B, B'), or the anterior (C, C') or posterior half (D, D') of the animal. Scale bars 100  $\mu\text{m}$ .
